# Supplementary material for: Serum Neurofilament Light Trajectories and Their Relation to Subclinical Radiological Disease Activity in Relapsing Multiple Sclerosis Patients in the APLIOS Trial
Source: PubMed Central journal article supplement — Neurol Ther. 2022 Dec 19;12(1):303–17. doi: 10.1007/s40120-022-00427-8 (PMC9837345; doi:10.1007/s40120-022-00427-8), 2022-12-19
Supplement: 40120_2022_427_MOESM1_ESM.pdf [file 40120_2022_427_MOESM1_ESM.pdf]

# **Serum Neurofilament Light Trajectories and Their Relation to Subclinical Radiological Disease Activity in Relapsing Multiple Sclerosis Patients in the APLIOS Trial**

Amit Bar-Or<sup>1</sup>, Xavier Montalban<sup>2</sup>, Xixi Hu<sup>3</sup>, Harald Kropshofer<sup>4</sup>, Petra Kukkaro<sup>4</sup>, Neva Coello<sup>4</sup>, Inga Ludwig<sup>4</sup>, Roman Willi<sup>4</sup>, Martin Zalesak<sup>4</sup>, Krishnan Ramanathan<sup>4</sup>, Bernd C. Kieseier<sup>4,5</sup>, Dieter A. Häring<sup>4</sup>, Morten Bagger<sup>4</sup>, Edward Fox<sup>6</sup>

<sup>1</sup>Center for Neuroinflammation and Experimental Therapeutics and Department of Neurology, Perelman School of Medicine, University of Pennsylvania, Philadelphia, Pennsylvania, USA; <sup>2</sup>Department of Neurology-Neuroimmunology and Centre d'Esclerosi Múltiple de Catalunya (Cemcat), Hospital Universitari Vall d'Hebron, Barcelona, Spain; <sup>3</sup>Novartis Pharmaceuticals Corporation, East Hanover, New Jersey, USA; <sup>4</sup>Novartis Pharma AG, Basel, Switzerland; <sup>5</sup>Department of Neurology, Medical Faculty, Heinrich-Heine University, Dusseldorf, Germany; <sup>6</sup>Central Texas Neurology Consultants and Dell Medical School, The University of Texas at Austin, Round Rock, Austin, Texas, USA

## **Corresponding Author:**

### **Dr. Amit Bar-Or**

Center for Neuroinflammation and Experimental Therapeutics and Department of Neurology, Perelman School of Medicine, University of Pennsylvania, Philadelphia, Pennsylvania, USA

Email: [amitbar@pennmedicine.upenn.edu](mailto:amitbar@pennmedicine.upenn.edu)

### Supplementary Material: Adjusted Geometric Mean sNFL Levels Over Time

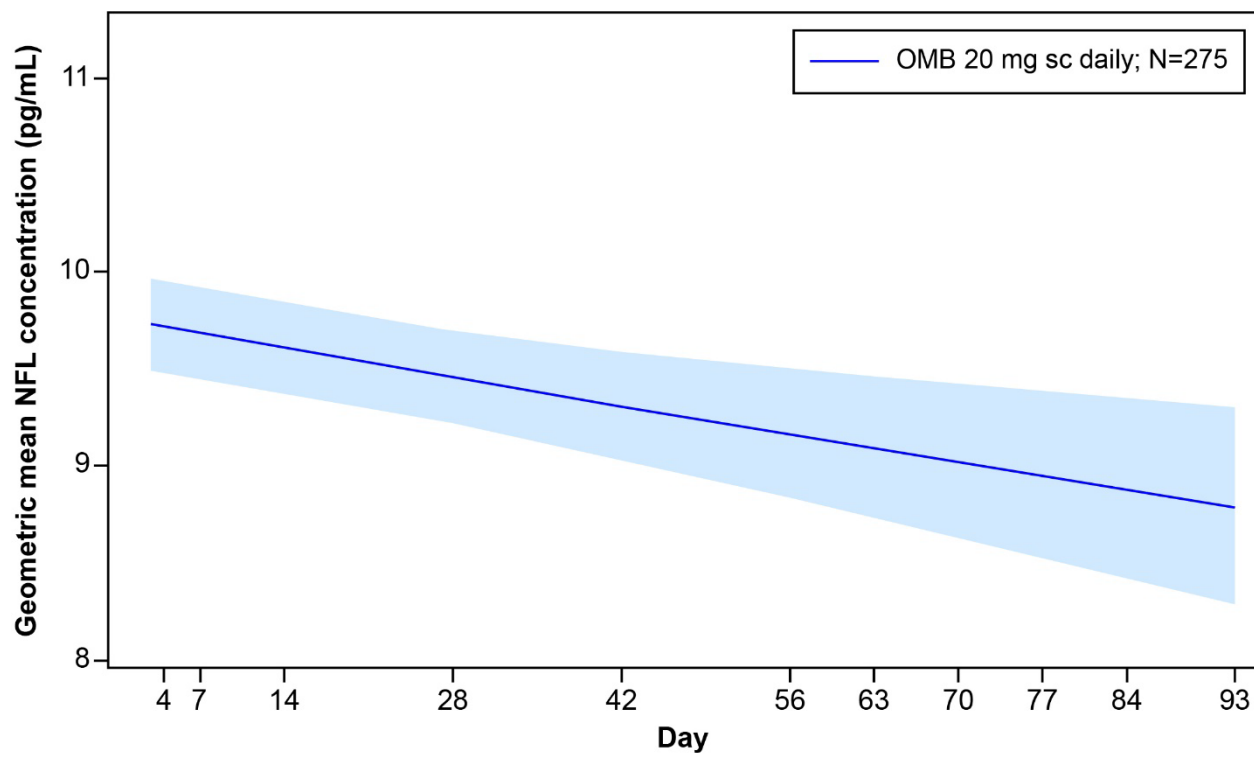

OMB, ofatumumab; sc, subcutaneous.
